# Supplementary material for: Biological invasion of oxeye daisy (Leucanthemum vulgare) in North America: Pre-adaptation, post-introduction evolution, or both?
Source: PubMed Central journal article supplement (PMC5754128; doi:10.1371/journal.pone.0190705), 2018-01-04
Supplement: pone.0190705.s001.pdf [file pone.0190705.s001.pdf]

**S1 Appendix. Results of flow cytometric analyses conducted with *Leucanthemum* seeds purchased from twelve US and one Canadian seed company.** Two samples, each containing ten seeds were analysed from each seed source (for more information on the methods see materials and methods section in the main article).

| Seed Company          | Country | Species name on package                        | Ploidy level | Correct species name           |
|-----------------------|---------|------------------------------------------------|--------------|--------------------------------|
| Blooming flower seeds | USA     | Oxeye daisy, <i>Chrysanthemum leucanthemum</i> | 4x           | <i>Leucanthemum ircutianum</i> |
| Buy Wholesale cheap   | USA     | Oxeye Daisy                                    | 4x           | <i>Leucanthemum ircutianum</i> |
| Dollarseed            | USA     | Oxeye Daisy                                    | 4x           | <i>Leucanthemum ircutianum</i> |
| Eden Brothers         | USA     | Oxeye daisy, <i>Chrysanthemum leucanthemum</i> | 4x           | <i>Leucanthemum ircutianum</i> |
| Everwilde Farms       | USA     | Oxeye daisy, <i>Chrysanthemum leucanthemum</i> | 4x           | <i>Leucanthemum ircutianum</i> |
| Horizon Herbs         | USA     | Oxeye daisy, <i>Chrysanthemum leucanthemum</i> | 2x           | <i>Leucanthemum vulgare</i>    |
| Sand Mountain Herbs   | USA     | Oxeye daisy, <i>Chrysanthemum leucanthemum</i> | 4x           | <i>Leucanthemum ircutianum</i> |
| Seedterra             | USA     | Oxeye daisy, <i>Chrysanthemum leucanthemum</i> | 4x           | <i>Leucanthemum ircutianum</i> |
| Seedville             | USA     | Oxeye daisy, <i>Chrysanthemum leucanthemum</i> | 4x           | <i>Leucanthemum ircutianum</i> |
| Sheffield's Seed      | USA     | Oxeye Daisy, <i>Leucanthemum vulgare</i>       | 4x           | <i>Leucanthemum ircutianum</i> |
| Todd's seed           | USA     | Oxeye daisy, <i>Chrysanthemum leucanthemum</i> | 4x           | <i>Leucanthemum ircutianum</i> |
| Top Tropicals         | USA     | <i>Leucanthemum vulgare</i>                    | 4x           | <i>Leucanthemum ircutianum</i> |
| Richters Herbs        | Canada  | Oxeye daisy, <i>Chrysanthemum leucanthemum</i> | 4x           | <i>Leucanthemum ircutianum</i> |
