# Supplementary material for: Biological invasion of oxeye daisy (Leucanthemum vulgare) in North America: Pre-adaptation, post-introduction evolution, or both?
Source: PubMed Central journal article supplement (PMC5754128; doi:10.1371/journal.pone.0190705), 2018-01-04
Supplement: pone.0190705.s002.pdf [file pone.0190705.s002.pdf]

**S2 Appendix.** Locations of *Leucanthemum vulgare* and *L. irtutianum* populations sampled in Eurasia and North America.

| Population code        | Country / state | Species              | Latitude (°N) | Longitude (°W) | Elevation (m) | Habitat           |
|------------------------|-----------------|----------------------|---------------|----------------|---------------|-------------------|
| Native range (Eurasia) |                 |                      |               |                |               |                   |
| BE1                    | Belgium         | <i>L. vulgare</i>    | 50.1091       | 5.2194         | 212           | roadside          |
| CZ04                   | Czech Republic  | <i>L. vulgare</i>    | 49.2381       | 15.6708        | 474           | forest/roadside   |
| CZ22                   | Czech Republic  | <i>L. vulgare</i>    | 50.3513       | 15.7563        | 265           | meadow            |
| CZ28                   | Austria         | <i>L. vulgare</i>    | 48.9174       | 15.3221        | 468           | meadow            |
| CZ30                   | Austria         | <i>L. vulgare</i>    | 48.7266       | 14.9107        | 511           | meadow            |
| DE8                    | Germany         | <i>L. vulgare</i>    | 48.2254       | 8.7720         | 643           | ruderal           |
| DE9                    | Germany         | <i>L. vulgare</i>    | 49.0406       | 11.8897        | 460           | field edge        |
| ES14                   | Spain           | <i>L. vulgare</i>    | 42.3636       | 1.2987         | 1326          | roadside          |
| FR17                   | France          | <i>L. vulgare</i>    | 43.9667       | 3.1185         | 782           | pasture           |
| FR32                   | France          | <i>L. vulgare</i>    | 44.0671       | 3.2002         | 483           | pasture           |
| FR33                   | France          | <i>L. vulgare</i>    | 44.1473       | 3.2680         | 821           | meadow            |
| FR34                   | France          | <i>L. vulgare</i>    | 44.1301       | 3.4001         | 974           | meadow            |
| FR38                   | France          | <i>L. vulgare</i>    | 44.2891       | 3.3329         | 848           | roadside          |
| FR44                   | France          | <i>L. vulgare</i>    | 43.8404       | 3.1400         | 632           | pasture           |
| FR46                   | France          | <i>L. vulgare</i>    | 43.9401       | 3.0089         | 542           | meadow            |
| GE1                    | Georgia         | <i>L. vulgare</i>    | 41.5729       | 44.3779        | 1477          | pipeline corridor |
| GE4                    | Georgia         | <i>L. vulgare</i>    | 41.6473       | 42.4787        | 1580          | n/a               |
| HU                     | Hungary         | <i>L. vulgare</i>    | 47.4158       | 19.8206        | 105           | meadow            |
| PL3VUL                 | Poland          | <i>L. vulgare</i>    | 49.5829       | 19.9350        | 557           | roadside          |
| RO5                    | Romania         | <i>L. vulgare</i>    | 47.4748       | 26.2703        | 375           | pasture           |
| BE2                    | Belgium         | <i>L. irtutianum</i> | 50.1534       | 5.4179         | 335           | roadside          |
| CH5                    | Switzerland     | <i>L. irtutianum</i> | 46.3495       | 8.7866         | 910           | meadow            |
| CH6                    | Switzerland     | <i>L. irtutianum</i> | 47.3238       | 7.3498         | 587           | meadow            |
| CZ2                    | Czech Republic  | <i>L. irtutianum</i> | 50.7859       | 15.1564        | 664           | meadow            |
| CZ9                    | Czech Republic  | <i>L. irtutianum</i> | 49.2051       | 17.8553        | 383           | meadow            |
| CZ21                   | Czech Republic  | <i>L. irtutianum</i> | 50.3825       | 15.7380        | 281           | meadow            |
| CZ29                   | Austria         | <i>L. irtutianum</i> | 48.7824       | 15.0382        | 522           | meadow            |
| DE6                    | Germany         | <i>L. irtutianum</i> | 48.1688       | 8.3945         | 903           | meadow            |
| FR20                   | France          | <i>L. irtutianum</i> | 43.4395       | 2.3973         | 600           | meadow            |
| FR26                   | France          | <i>L. irtutianum</i> | 47.3241       | -2.0137        | 6             | meadow            |
| FR36                   | France          | <i>L. irtutianum</i> | 44.1108       | 3.4036         | 750           | meadow            |
| FR39                   | France          | <i>L. irtutianum</i> | 43.9678       | 3.1144         | 808           | meadow            |
| FR41                   | France          | <i>L. irtutianum</i> | 43.7559       | 2.9761         | 744           | pasture           |
| FR43                   | France          | <i>L. irtutianum</i> | 43.4340       | 2.6053         | 801           | pasture           |
| GE2                    | Georgia         | <i>L. irtutianum</i> | 41.7388       | 43.5004        | 1654          | roadside/meadow   |
| PL3IRC                 | Poland          | <i>L. irtutianum</i> | 49.5829       | 19.9340        | 557           | roadside          |
| RO6                    | Romania         | <i>L. irtutianum</i> | 47.0949       | 26.3254        | 259           | meadow            |
| RO8                    | Romania         | <i>L. irtutianum</i> | 45.3321       | 22.7253        | 1096          | roadside/meadow   |
| RUS2                   | Russia          | <i>L. irtutianum</i> | 60.0650       | 30.4365        | 19            | roadside          |
| RUS3                   | Russia          | <i>L. irtutianum</i> | 50.5415       | 36.0395        | 200           | meadow            |
| SK2                    | Slovakia        | <i>L. irtutianum</i> | 48.8795       | 19.2333        | 963           | roadside          |

| Population code                | Country / state  | Species           | Latitude (N) | Longitude (W) | Elevation (m) | Habitat                      |
|--------------------------------|------------------|-------------------|--------------|---------------|---------------|------------------------------|
| Introduced range (Canada, USA) |                  |                   |              |               |               |                              |
| NA1                            | British Columbia | <i>L. vulgare</i> | 54.9485      | -127.2445     | 480           | roadside                     |
| NA3                            | Alberta          | <i>L. vulgare</i> | 51.1781      | -115.7164     | 1472          | roadside                     |
| NA4                            | British Columbia | <i>L. vulgare</i> | 51.5541      | -121.2682     | 1186          | utility line                 |
| NA5                            | British Columbia | <i>L. vulgare</i> | 49.9632      | -116.9750     | 1167          | roadside                     |
| NA6                            | British Columbia | <i>L. vulgare</i> | 53.8645      | -123.2503     | 796           | roadside                     |
| NA7                            | British Columbia | <i>L. vulgare</i> | 48.5690      | -123.6368     | 235           | roadside                     |
| NA8                            | British Columbia | <i>L. vulgare</i> | 48.5138      | -123.5717     | 378           | roadside                     |
| NA10                           | Montana          | <i>L. vulgare</i> | 46.9564      | -112.7105     | 1375          | pasture                      |
| NA11                           | Minnesota        | <i>L. vulgare</i> | 46.1726      | -92.8709      | 338           | pasture                      |
| NA12                           | Wyoming          | <i>L. vulgare</i> | 43.4980      | -110.8520     | 1890          | roadside/meadow              |
| NA13                           | Minnesota        | <i>L. vulgare</i> | 45.2010      | -92.8837      | 298           | roadside                     |
| NA14                           | Minnesota        | <i>L. vulgare</i> | 47.2060      | -91.3685      | 217           | roadside                     |
| NA15                           | Colorado         | <i>L. vulgare</i> | 39.1667      | -105.1655     | 2246          | riperian                     |
| NA16                           | Washington       | <i>L. vulgare</i> | 47.3032      | -121.2878     | 750           | forest opening               |
| NA17                           | Washington       | <i>L. vulgare</i> | 47.0585      | -123.1941     | 115           | forest opening/roadside      |
| NA18                           | Washington       | <i>L. vulgare</i> | 46.8840      | -123.3069     | 38            | meadow                       |
| NA19                           | Oregon           | <i>L. vulgare</i> | 45.1753      | -121.6784     | 1115          | ruderal                      |
| NA20                           | Montana          | <i>L. vulgare</i> | 46.6995      | -116.5402     | 835           | Conservation Reserve Program |
| NA21                           | Montana          | <i>L. vulgare</i> | 47.3221      | -115.0760     | 887           | meadow                       |
| NA22                           | British Columbia | <i>L. vulgare</i> | 49.5016      | -114.2797     | 1283          | meadow                       |
| NA23                           | Alberta          | <i>L. vulgare</i> | 54.5906      | -113.2501     | 624           | field edge                   |
