# Supplementary material for: Biological invasion of oxeye daisy (Leucanthemum vulgare) in North America: Pre-adaptation, post-introduction evolution, or both?
Source: PubMed Central journal article supplement (PMC5754128; doi:10.1371/journal.pone.0190705), 2018-01-04
Supplement: pone.0190705.s003.pdf [file pone.0190705.s003.pdf]

**S3 Appendix.** List of traits recorded for *Leucanthemum vulgare* and *L. ircutianum* grown in a common garden.

| Code                        | Description                                                                                                                                 | Reason why this trait was included in the study                                                                                                                                                                             |
|-----------------------------|---------------------------------------------------------------------------------------------------------------------------------------------|-----------------------------------------------------------------------------------------------------------------------------------------------------------------------------------------------------------------------------|
| <b>Performance traits</b>   |                                                                                                                                             |                                                                                                                                                                                                                             |
| germrate                    | Germination rate                                                                                                                            | Correlated with population performance (establishment success and spread)                                                                                                                                                   |
| bladeL                      | Blade length of longest leaf of three-month old seedlings (mm)                                                                              | Correlated with seedling biomass, indication for seedling growth, competitive ability                                                                                                                                       |
| leaves                      | Number of leaves longer than 1 cm at the seedling stage                                                                                     | Indicator of seedling growth, competitive ability                                                                                                                                                                           |
| shoots                      | Number of shoots at the end of the flowering stage                                                                                          | Correlated with plant size, vegetative performance, competitive ability                                                                                                                                                     |
| FH                          | Number of flower heads at the end of the flowering stage                                                                                    | Correlated with reproductive output/fitness                                                                                                                                                                                 |
| shootlength                 | Length of longest shoot at the end of the flowering stage (cm)                                                                              | Correlated with plant size, vegetative performance, competitive ability                                                                                                                                                     |
| biomass                     | Dry weight of above ground biomass at the end of the flowering stage (g)                                                                    | Correlated with plant size, vegetative performance, competitive ability                                                                                                                                                     |
| <b>Functional traits</b>    |                                                                                                                                             |                                                                                                                                                                                                                             |
| germtime                    | Number of days from sowing to germination                                                                                                   | Rapid germination may increase establishment through size advantage                                                                                                                                                         |
| sow_flow                    | Number of days from sowing to first flower completely open                                                                                  | Potential differences between species ( <i>L. vulgare</i> is reported to flower earlier than <i>L. ircutianum</i> ) and ranges (in the field <i>L. vulgare</i> is observed to flower later in North America than in Europe) |
| LDMC                        | Leaf dry matter content: ratio of dry to fresh weight of a randomly chosen rosette leaf                                                     | Indicator of resource-use strategy, correlated with resource conservation, negatively correlated with relative growth rate                                                                                                  |
| SLA                         | Specific leaf area: ratio of area to dry weight of a randomly chosen rosette leaf (mm <sup>2</sup> /mg)                                     | Indicator of resource-use strategy, correlated with relative growth rate                                                                                                                                                    |
| <b>Morphological traits</b> |                                                                                                                                             |                                                                                                                                                                                                                             |
| bladeL_bladeW               | Length to width ratio of the blade of the longest leaf of three-month old seedlings                                                         | Potentially important for species determination at seedling stage                                                                                                                                                           |
| ros_peri_area               | Perimeter to area ratio of randomly chosen rosette leaf                                                                                     | Indicator of leaf dissection, potentially important for species determination at rosette stage                                                                                                                              |
| st_peri_area                | Perimeter to area ratio of randomly chosen mid-stem leaf                                                                                    | Indicator of leaf dissection, potentially important for species determination at flowering stage                                                                                                                            |
| st_length_width             | Length to width ratio of randomly chosen mid-stem leaf (leaf width was measured at the leaf length midpoint, not including lobes and teeth) | Potentially important for species determination at flowering stage                                                                                                                                                          |
| st_mid_base                 | Width of undivided middle part at the base divided by the total width at the base of a randomly chosen stem leaf                            | Potentially important for species determination at flowering stage                                                                                                                                                          |
| flowdia                     | Flower head diameter (mm, average taken from three flower heads per plant)                                                                  | Potentially important for species determination at flowering stage                                                                                                                                                          |
