# Supplementary material for: Biological invasion of oxeye daisy (Leucanthemum vulgare) in North America: Pre-adaptation, post-introduction evolution, or both?
Source: PubMed Central journal article supplement (PMC5754128; doi:10.1371/journal.pone.0190705), 2018-01-04
Supplement: pone.0190705.s004.pdf [file pone.0190705.s004.pdf]

**S4 Appendix.** Measurements taken on scanned mid-stem leaves of *Leucanthemum vulgare* (left) and *L. ircutianum* (right).

A: leaf length

B: leaf width, measured at the leaf length midpoint, not including any lobes or teeth

C: width of undivided middle part at the leaf base

D: total width at the leaf base

**st\_length\_width:** A/D

**st\_mid\_base:** C/D

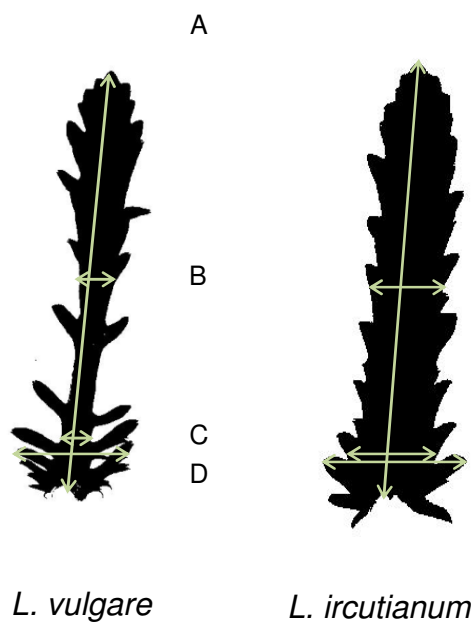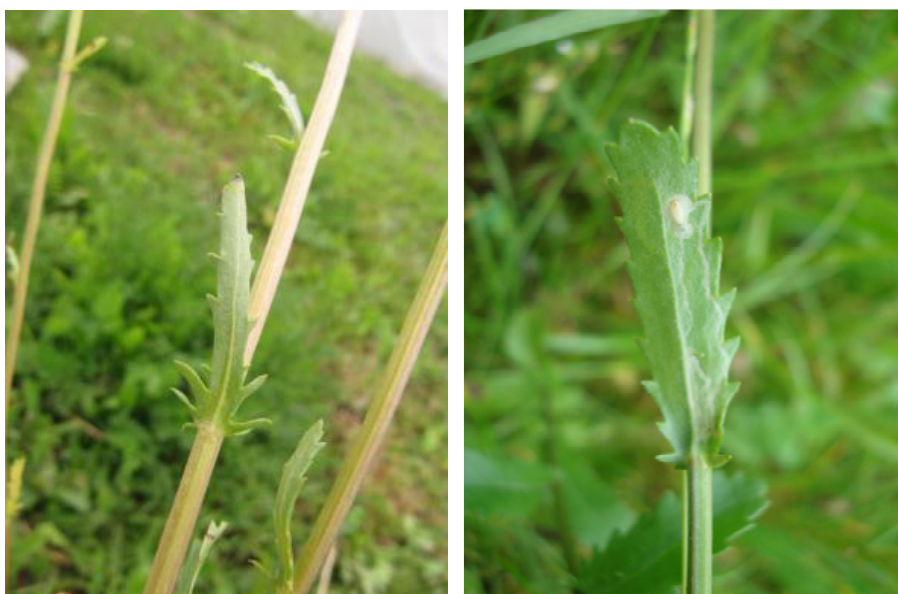

Pictures of a typical mid-stem leaf of *L. vulgare* (left) and *L. ircutianum* (right).
