# Supplementary material for: Biological invasion of oxeye daisy (Leucanthemum vulgare) in North America: Pre-adaptation, post-introduction evolution, or both?
Source: PubMed Central journal article supplement (PMC5754128; doi:10.1371/journal.pone.0190705), 2018-01-04
Supplement: pone.0190705.s006.pdf [file pone.0190705.s006.pdf]

**S6 Appendix.** Eigenvectors showing correlations of traits with the first two principal components for the Principal Component Analyses (PCAs) on individual plants (see Appendix S4) and on population means (see Fig. 2). Values for traits best correlated with the first or second PCA axis (> 0.30) are in bold. For the abbreviations of the different traits see Appendix S2.

| Trait           | PCA based on plants |               | PCA based on populations |               |
|-----------------|---------------------|---------------|--------------------------|---------------|
|                 | Axis 1              | Axis 2        | Axis 1                   | Axis 2        |
| biomass         | <b>0.393</b>        | <b>0.311</b>  | <b>-0.346</b>            | 0.264         |
| bladeL          | 0.041               | <b>0.347</b>  | 0.035                    | <b>0.390</b>  |
| bladeL_bladeW   | -0.004              | 0.120         | 0.063                    | 0.048         |
| FH              | <b>0.426</b>        | 0.203         | <b>-0.373</b>            | 0.170         |
| flowdia         | 0.003               | 0.247         | -0.000                   | <b>0.325</b>  |
| germrate        | -0.119              | 0.051         | 0.212                    | 0.028         |
| germtime        | 0.072               | -0.107        | -0.154                   | -0.025        |
| LDMC            | -0.129              | 0.059         | 0.097                    | 0.180         |
| leaves          | 0.071               | 0.047         | 0.045                    | 0.015         |
| ros_peri_area   | 0.202               | <b>-0.361</b> | -0.218                   | <b>-0.360</b> |
| shootlength     | 0.265               | <b>0.367</b>  | -0.270                   | <b>0.395</b>  |
| shoots          | <b>0.333</b>        | 0.039         | <b>-0.317</b>            | 0.005         |
| SLA             | 0.192               | -0.084        | -0.195                   | -0.094        |
| sow_flow        | 0.198               | 0.276         | -0.219                   | <b>0.375</b>  |
| st_length_width | <b>0.355</b>        | -0.140        | <b>-0.387</b>            | -0.055        |
| st_mid_base     | <b>-0.335</b>       | <b>0.335</b>  | <b>0.329</b>             | 0.269         |
| st_peri_area    | 0.293               | <b>-0.405</b> | <b>-0.302</b>            | <b>-0.311</b> |
