# Supplementary material for: Biological invasion of oxeye daisy (Leucanthemum vulgare) in North America: Pre-adaptation, post-introduction evolution, or both?
Source: PubMed Central journal article supplement (PMC5754128; doi:10.1371/journal.pone.0190705), 2018-01-04
Supplement: pone.0190705.s007.pdf [file pone.0190705.s007.pdf]

**S7 Appendix.** Mean ( $\pm$  SE) trait values for 20 *Leucanthemum vulgare* and 21 *L. ircutianum* populations from the native range, Eurasia (EU) and 21 *L. vulgare* populations from the introduced range, North America (NA) grown in a common garden. For the abbreviations of the different traits see Appendix S2.

| Trait                       | <i>L. ircutianum</i><br>(EU) | vs. <sup>a</sup> | <i>L. vulgare</i> (EU) | vs. <sup>a</sup> | <i>L. vulgare</i> (NA) |
|-----------------------------|------------------------------|------------------|------------------------|------------------|------------------------|
| <b>Performance traits</b>   |                              |                  |                        |                  |                        |
| germrate                    | 0.88 $\pm$ 0.02              | 0.04             | 0.79 $\pm$ 0.04        | n.s.             | 0.80 $\pm$ 0.02        |
| bladeL                      | 36.20 $\pm$ 0.84             | <0.001           | 32.14 $\pm$ 0.63       | 0.001            | 35.80 $\pm$ 0.83       |
| leaves                      | 11.40 $\pm$ 0.35             | n.s.             | 11.25 $\pm$ 0.40       | n.s.             | 11.82 $\pm$ 0.33       |
| shoots                      | 9.10 $\pm$ 0.29              | 0.004            | 11.18 $\pm$ 0.53       | n.s.             | 12.18 $\pm$ 0.43       |
| FH                          | 24.20 $\pm$ 1.43             | 0.03             | 31.40 $\pm$ 2.91       | <0.001           | 47.38 $\pm$ 2.75       |
| shootlength                 | 81.86 $\pm$ 1.73             | n.s.             | 77.98 $\pm$ 2.36       | <0.001           | 94.08 $\pm$ 1.09       |
| biomass                     | 24.62 $\pm$ 1.11             | n.s.             | 26.50 $\pm$ 2.06       | <0.001           | 37.83 $\pm$ 1.80       |
| <b>Functional traits</b>    |                              |                  |                        |                  |                        |
| germtime                    | 9.20 $\pm$ 0.26              | n.s.             | 9.54 $\pm$ 0.52        | n.s.             | 9.70 $\pm$ 0.28        |
| sow_flow                    | 212.66 $\pm$ 2.88            | n.s.             | 208.15 $\pm$ 2.27      | <0.001           | 224.06 $\pm$ 0.73      |
| LDMC                        | 0.15 $\pm$ 0.00              | n.s.             | 0.15 $\pm$ 0.00        | n.s.             | 0.15 $\pm$ 0.00        |
| SLA                         | 15.61 $\pm$ 0.30             | 0.006            | 16.64 $\pm$ 0.28       | n.s.             | 16.91 $\pm$ 0.25       |
| <b>Morphological traits</b> |                              |                  |                        |                  |                        |
| bladeL_bladeW               | 1.34 $\pm$ 0.08              | n.s.             | 1.34 $\pm$ 0.02        | n.s.             | 1.32 $\pm$ 0.02        |
| ros_peri_area               | 0.41 $\pm$ 0.01              | <0.001           | 0.53 $\pm$ 0.01        | n.s.             | 0.49 $\pm$ 0.01        |
| st_peri_area                | 0.36 $\pm$ 0.01              | <0.001           | 0.59 $\pm$ 0.01        | n.s.             | 0.58 $\pm$ 0.01        |
| st_length_width             | 7.46 $\pm$ 0.39              | <0.001           | 12.93 $\pm$ 0.47       | <0.001           | 15.10 $\pm$ 0.41       |
| st_mid_base                 | 0.62 $\pm$ 0.02              | <0.001           | 0.37 $\pm$ 0.01        | n.s.             | 0.36 $\pm$ 0.01        |
| flowdia                     | 51.43 $\pm$ 0.76             | 0.01             | 48.77 $\pm$ 0.64       | <0.001           | 52.59 $\pm$ 0.58       |

<sup>a</sup> *P*-values from linear mixed models and generalized linear mixed models comparing Eurasian (EU) *L. vulgare* with Eurasian *L. ircutianum* populations and Eurasian with North American (NA) *L. vulgare* populations. n.s.: *P* > 0.05.
